# Supplementary material for: Assesment of bone healing after surgical management of odontogenic cysts utilizing fractal analysis—a retrospective cross-sectional study
Source: PeerJ journal article supplement (doi:10.7717/peerj.19745), 2025-07-18
Supplement: Rawdata.xlsx [file Rawdata.xlsx]

## Sheet: Sheet1
Pathology	Fractal_Center_Before	Lacunarity_Center_Before	Fractal_Edge_Before	Lacunarity_Edge_Before	Fractal_Unaffected_Before	Lacunarity_Unaffected_Before	Fractal_Center_After	Lacunarity_Center_After	Fractal_Edge_After	Lacunarity_Edge_After	Fractal_Unaffected_After	Lacunarity_Unaffected_After	Gender	Age
keratocyst	1.4237	0.03565	1.3024	0.03585	1.43895	0.03415	1.54315	0.02875	1.4027	0.04165	1.4544	0.02295	male	74
residual	1.3487	0.054	1.23055	0.0236	1.64225	0.01615	1.27125	0.04565	1.3414	0.04455	1.53695	0.0207	male	66
radicular	1.26065	0.1748	1.33555	0.12315	1.3491	0.1545	1.4607	0.08015	1.4935	0.0587	1.2745	0.11885	male	19
radicular	1.2398	0.06915	1.1898	0.0532	1.43555	0.04575	1.17535	0.08335	1.103	0.04425	1.47135	0.0338	male	28
keratocyst	1.57975	0.01705	1.31145	0.08275	1.55255	0.0377	1.5348	0.0338	1.25095	0.04155	1.4464	0.0456	male	36
radicular	1.4125	0.0265	1.3425	0.0598	1.439	0.037	1.3166	0.0738	1.3115	0.02165	1.3879	0.04305	male	43
radicular	1.4343	0.0689	1.3746	0.06855	1.3337	0.07225	1.20985	0.0853	1.2563	0.07505	1.45775	0.03165	male	37
keratocyst	1.3964	0.0282	1.53605	0.01395	1.59865	0.0324	1.42925	0.0475	1.4726	0.05255	1.49355	0.0247	male	18
dentigeroz	1.38675	0.0266	1.49215	0.04135	1.4726	0.0429	1.39615	0.05185	1.59965	0.042	1.4197	0.04355	male	30
radicular	1.42085	0.06185	1.31915	0.07345	1.4784	0.0427	1.34415	0.14005	1.37225	0.06195	1.3409	0.04275	female	37
residual	1.213	0.08795	1.19515	0.067	1.5493	0.072	1.3106	0.05655	1.325	0.0378	1.5958	0.0277	female	49
radicular	1.51885	0.02205	1.2423	0.0286	1.65645	0.0268	1.39515	0.0226	1.50535	0.02505	1.40195	0.0278	female	41
radicular	1.49645	0.04215	1.4127	0.08255	1.58705	0.03415	1.3449	0.04645	1.20605	0.05415	1.2692	0.06685	male	25
dentigeroz	1.37845	0.04995	1.49255	0.0566	1.6087	0.043	1.4669	0.06	1.62995	0.029	1.564	0.05665	male	18
radicular	1.327	0.11655	1.3443	0.0565	1.49705	0.0317	1.3911	0.051	1.4647	0.04085	1.5101	0.0389	female	33
radicular	1.5209	0.03955	1.5612	0.04155	1.3879	0.0432	1.35	0.0599	1.50595	0.0394	1.4715	0.0339	female	32
keratocyst	1.27445	0.03565	1.3763	0.0616	1.5198	0.055	1.35645	0.03225	1.23415	0.0278	1.5106	0.0631	female	20
