# Supplementary material for: Assesment of bone healing after surgical management of odontogenic cysts utilizing fractal analysis—a retrospective cross-sectional study
Source: PeerJ journal article supplement (doi:10.7717/peerj.19745), 2025-07-18
Supplement: STROBE.pdf [file STROBE.pdf]

## **STROBE Checklist for Cross-Sectional Studies**

Checklist completed according to the article: Assessment of Bone Healing After Surgical Management of Odontogenic Cysts Utilizing Fractal Analysis

### **Item 1**

- (a) Indicate the study's design with a commonly used term in the title or the abstract.
- (b) Provide in the abstract an informative and balanced summary of what was done and what was found.

Location in manuscript: Title and Abstract

### **Item 2**

Explain the scientific background and rationale for the investigation being reported.

Location in manuscript: Introduction

### **Item 3**

State specific objectives, including any prespecified hypotheses.

Location in manuscript: Introduction - last paragraph

### **Item 4**

Present key elements of study design early in the paper.

Location in manuscript: Materials and Methods - Study Design

### **Item 5**

Describe the setting, locations, and relevant dates, including periods of recruitment, exposure, follow-up, and data collection.

Location in manuscript: Materials and Methods - Patient Enrollment

### **Item 6**

Give the eligibility criteria, and the sources and methods of selection of participants.

Location in manuscript: Materials and Methods - Patient Enrollment

### **Item 7**

Clearly define all outcomes, exposures, predictors, potential confounders, and effect modifiers.

Location in manuscript: Materials and Methods - Image Analysis and Evaluation

### **Item 8**

For each variable of interest, give sources of data and details of methods of assessment (measurement).

Location in manuscript: Materials and Methods - Image Analysis

### **Item 9**

Describe any efforts to address potential sources of bias.

Location in manuscript: STROBE Additions - Bias

### **Item 10**

Explain how the study size was arrived at.

Location in manuscript: STROBE Additions - Sample Size

### **Item 11**

Explain how quantitative variables were handled in the analyses. If applicable, describe which groupings were chosen and why.

Location in manuscript: Materials and Methods - Statistical Analysis

### **Item 12**

Describe all statistical methods, including those used to control for confounding.

Describe any methods used to examine subgroups and interactions.

Explain how missing data were addressed.

If applicable, describe analytical methods taking account of sampling strategy.

Describe any sensitivity analyses.

Location in manuscript: Materials and Methods - Statistical Analysis and STROBE Additions - Sensitivity Analysis

### **Item 13**

- (a) Report numbers of individuals at each stage of study.
- (b) Give reasons for non-participation at each stage.
- (c) Consider use of a flow diagram.

Location in manuscript: Materials and Methods - Flow of Participants

### **Item 14**

- (a) Give characteristics of study participants.
- (b) Indicate number of participants with missing data for each variable of interest.

Location in manuscript: Results and Table 1

### **Item 15**

Report numbers of outcome events or summary measures.

Location in manuscript: Results and Table 2

### **Item 16**

- (a) Give unadjusted estimates and, if applicable, confounder-adjusted estimates and their precision.
- (b) Report category boundaries when continuous variables were categorized.
- (c) If relevant, consider translating estimates of relative risk into absolute risk for a meaningful time period.

Location in manuscript: Results

### **Item 17**

Report other analyses done—e.g., analyses of subgroups and interactions, and sensitivity analyses.

Location in manuscript: STROBE Additions - Sensitivity Analysis

### **Item 18**

Summarise key results with reference to study objectives.

Location in manuscript: Discussion - First paragraph

### **Item 19**

Discuss limitations of the study, taking into account sources of potential bias or imprecision.

Location in manuscript: Discussion - Limitations paragraph

### **Item 20**

Give a cautious overall interpretation of results considering objectives, limitations, multiplicity of analyses, results from similar studies, and other relevant evidence.

Location in manuscript: Discussion - Final paragraph

### **Item 21**

Discuss the generalisability (external validity) of the study results.

Location in manuscript: STROBE Additions - Generalisability

### **Item 22**

Give the source of funding and the role of the funders for the present study and, if applicable, for the original study on which the present article is based.

Location in manuscript: Title Page - Funding and Conflict of Interest
